# Supplementary material
Source: PubMed Central journal article supplement (PMC9652762)
Supplement: NIHMS1845532-supplement-bfac933asupp1_pdf.pdf [file NIHMS1845532-supplement-bfac933asupp1_pdf.pdf]

## Supplementary information

### An Open-Source Bioink Database for Microextrusion 3D Printing

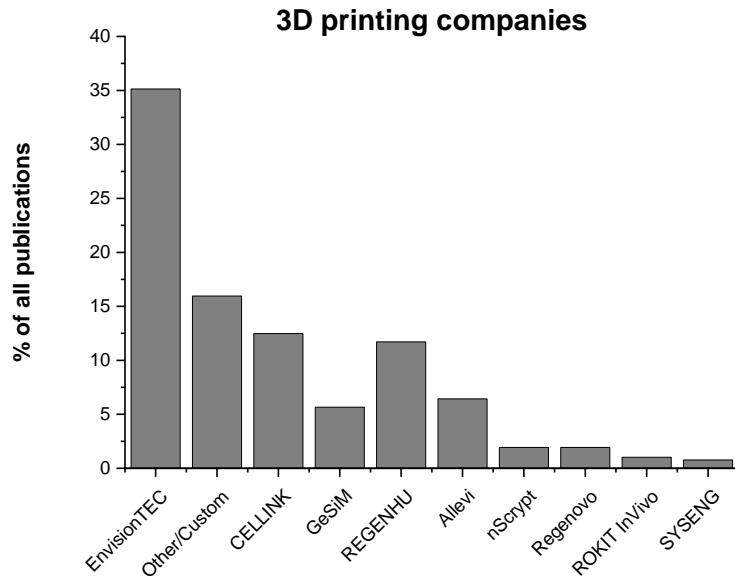

**Supplemental Figure 1.** List of top 10 3D printing companies whose printers of various models were used in the database publications.

**Supplementary Table 1.** Pearson correlation coefficients for printing parameters involving 100 wt% PCL at different molecular weights.

|                         | <b>Mol. Wt. (kDa)</b> | <b>Pressure (bar)</b> | <b>Temp (°C)</b> | <b>Needle Size (µm)</b> | <b>Speed (mm/s)</b> |
|-------------------------|-----------------------|-----------------------|------------------|-------------------------|---------------------|
| <b>Mol. Wt. (kDa)</b>   | 1                     | 0.034                 | 0.07             | 0.044                   | -0.067              |
| <b>Pressure (bar)</b>   |                       | 1                     | -0.015           | -0.074                  | 0.1                 |
| <b>Temp (°C)</b>        |                       |                       | 1                | 0.13                    | -0.186              |
| <b>Needle Size (µm)</b> |                       |                       |                  | 1                       | -0.066              |
| <b>Speed (mm/s)</b>     |                       |                       |                  |                         | 1                   |

**Supplementary Table 2.** Pearson correlation coefficients for printing parameters involving all PCL wt%

|                         | <b>Wt %</b> | <b>Press. (bar)</b> | <b>Temp (°C)</b> | <b>Speed (mm/s)</b> | <b>Needle Size (µm)</b> |
|-------------------------|-------------|---------------------|------------------|---------------------|-------------------------|
| <b>Wt %</b>             | 1           | 0.3***              | 0.28***          | -0.155*             | -0.098                  |
| <b>Press. (bar)</b>     |             | 1                   | 0.44***          | 0.016               | -0.668***               |
| <b>Temp (°C)</b>        |             |                     | 1                | -0.183*             | -0.08                   |
| <b>Speed (mm/s)</b>     |             |                     |                  | 1                   | -0.109                  |
| <b>Needle Size (µm)</b> |             |                     |                  |                     | 1                       |

\* p<0.05; \*\* p<0.01; \*\*\* p<0.001

**Supplementary Table 3.** Pearson correlation coefficients for printing parameters involving GelMA as the only bioink components.

|                  | Wt % | Press. (bar) | Temp (°C) | Speed (mm/s) | Needle Size (µm) |
|------------------|------|--------------|-----------|--------------|------------------|
| Wt %             | 1    | 0.63***      | 0.028     | 0.346***     | 0.002            |
| Press. (bar)     |      | 1            | -0.126    | 0.145        | -0.015           |
| Temp (°C)        |      |              | 1         | -0.265**     | -0.53***         |
| Speed (mm/s)     |      |              |           | 1            | 0.133            |
| Needle Size (µm) |      |              |           |              | 1                |

\* p<0.05; \*\* p<0.01; \*\*\* p<0.001

**Supplementary Table 4.** Pearson correlation coefficients for printing parameters involving all GelMA-based bioinks.

|                  | Wt % | Press. (bar) | Temp (°C) | Speed (mm/s) | Needle Size (µm) |
|------------------|------|--------------|-----------|--------------|------------------|
| Wt %             | 1    | 0.262***     | 0.133     | 0.015        | -0.091           |
| Press. (bar)     |      | 1            | -0.027    | -0.00327     | -0.048           |
| Temp (°C)        |      |              | 1         | -0.445***    | -0.221**         |
| Speed (mm/s)     |      |              |           | 1            | 0.191*           |
| Needle Size (µm) |      |              |           |              | 1                |

\* p<0.05; \*\* p<0.01; \*\*\* p<0.001

**Supplementary Table 5.** Pearson correlation coefficients for printing parameters involving all cell-based bioinks.

|                      | Nozzle diameter (µm) | Press. (bar) | Needle type |
|----------------------|----------------------|--------------|-------------|
| Nozzle diameter (µm) | 1                    | 0.128*       | -0.02       |
| Press. (bar)         |                      | 1            | 0.184***    |
| Needle type          |                      |              | 1           |

Needle type: 1 = cone; 2 = cylinder

\* p<0.05; \*\*\* p<0.001

**Supplementary Table 6.** List of cells used in 3D printing for publications on the database.

|                                              |
|----------------------------------------------|
| NIH 3T3 Fibroblasts                          |
| Human Mesenchymal Stem Cells                 |
| Human Umbilical Vein Endothelial Cells       |
| Primary Rat Schwann Cells                    |
| C2C12 Myoblasts                              |
| Human Dermal Fibroblasts                     |
| EGFR T790M Non-Small Cell Lung Carcinoma PDX |
| AA0022 Lung Cancer Associated Fibroblasts    |
| Primary Bovine Chondrocytes                  |
| RSC96 Neuronal Schwann Cells                 |
| L929 Fibroblasts                             |
| Bone Marrow Derived Mesenchymal Stem Cells   |
| Saos-2 Human Bone Osteosarcoma cells         |
| Placenta BeWo Cells                          |
| Human Chondrocytes                           |
| Primary Embryonic Chick Chondrocytes         |
| HEPG2 Liver Cells                            |
| Primary Chick Chondrocytes                   |
| A549 Human Epithelial Cells                  |
| Primary Porcine Bone Marrow Stromal Cells    |
| Primary Porcine Cartilage Chondrocytes       |
| BEL-7402 Adenocarcinoma Cells                |

|                                                        |
|--------------------------------------------------------|
| Primary Rat Bone Marrow Mesenchymal Stem Cells         |
| PCS-201-010 Primary Dermal Fibroblasts                 |
| hiPSC-derived Ventral Spinal Neuronal Progenitor Cells |
| miPSC-derived Oligodendrocyte Progenitor Cells         |
| Human Induced Pluripotent Stem Cells                   |
| Primary Rabbit Adipose-Derived Mesenchymal Stem Cells  |
| Human Glial Cells                                      |
| Primary Human Nasal Septal Cartilage Chondrocyte       |
| Primary Human Periodontal Ligament Cells               |
| ATDC5 Chondrocytes                                     |
| Primary Sheep Chondrocytes                             |
| HEK293 Kidney Cells                                    |
| Human Fibroblasts                                      |
| Cell Line SH-SY5Y                                      |
| Primary Human Adipose-derived Mesenchymal Stem Cells   |
| S16Y Schwann Cells                                     |
| Human Coronary Artery Endothelial Cells                |
| Human Adipose Stem Cells                               |
| Human Bone Marrow-derived Mesenchymal Stem Cells       |
| NIH 3T3 Fibroblasts GFP                                |
| Immortalized Human Mesenchymal Stem Cells              |
| Human Esophageal Epithelial Cells                      |
| Human Esophageal Smooth Muscle Cells                   |
| Cell Line HepaRG                                       |
| Primary Human Umbilical Vein Endothelial Cells         |
| Primary Human Amniotic Fluid-derived Stem Cells        |
| Primary Rabbit Ear Chondrocytes                        |
| Primary Neonatal Rat Ventricular Cardiomyocytes        |
| Primary Human Muscle Progenitor Cells                  |
| Human Epidermal Keratinocytes                          |
| Human Epidermal Fibroblasts                            |
| Primary Adult Human Dermal Fibroblasts                 |
| Primary Human Nasoseptal Cartilage                     |
| Primary Rat Bone Marrow-Derived Mesenchymal Stem Cells |
| Primary Rat Bone Mesenchymal Stem Cells                |
| H9C2 Myoblasts                                         |
| SK-N-BE(2) Neuroblasts                                 |
| Primary Mouse Epidermal Stem Cells                     |
| MDA-MB-231 Epithelial Cells                            |
| Primary Rabbit Fibrochondrocytes                       |
| Primary Rat Cardiac Myocytes                           |

|                                                                     |
|---------------------------------------------------------------------|
| Human Dermal Fibroblasts/ Primary Human Epidermal Keratinocytes Mix |
| MG63 Osteoblast-like Cells                                          |
| Human Adipose-derived Stem Cells                                    |
| Plant cells - Basil                                                 |
| Primary Human Nasal Inferior Turbinate Tissue-derived               |
| Primary Rabbit Bladder Urothelial Cells                             |
| Primary Rabbit Smooth Muscle Cells                                  |
| Balb 3T3 Mouse Fibroblasts                                          |
| Cell Line MC3T3-E1 Osteoblasts                                      |
| Murine Bone Marrow Stromal Cells                                    |
| PC-12 Cells                                                         |
| C57BL/6 Mouse Embryonic Stem Cells                                  |
| Neural Stem Cells iPSC Differentiated                               |
| Bone Marrow-derived Mesenchymal Stem Cells                          |
| Primary Porcine Stromal Vascular Fraction Cells                     |
| Primary Human Adipose Derived Stem Cells                            |
| Human Neural Stem Cells                                             |
| Human Osteogenic Sarcoma Cells                                      |
| 21 PT Breast Cancer Cells                                           |
| Adipose-Derived Mesenchymal Stem Cells                              |
| Primary Human Dermal Fibroblasts                                    |
| Hela Pancreatic Cancer Cells                                        |
| Primary Juvenile Mice Interstitial Cells                            |
| Primary Human Hepatocytes                                           |
| Primary Myoblasts                                                   |
| Human Articular Chondrocytes                                        |
| Primary Bone Marrow Stem Cells                                      |
| Human amniotic epithelial cells                                     |
| Wharton's jelly derived Mesenchymal Stem Cells                      |
| Primary Human Articular Chondrocytes                                |
| Primary Human Chondrocytes                                          |
| Human Dermal Fibroblasts with FoxD3 Plasmid                         |
| Human-adipose tissue derived Mesenchymal Stem Cells                 |
| GSC23 Glioblastoma Cells                                            |
| Equine-derived Mesenchymal Stromal Cells                            |
| Human Adipose Derived Stem Cells                                    |
| Skeletal Stem Cells                                                 |
| Human mesenchymal stem cell                                         |
| Human Bone Marrow Mesenchymal Stem Cells                            |
| Primary Porcine Chondrocytes                                        |
| Wharton's Jelly Derived Mesenchymal Stem Cells                      |

|                                 |
|---------------------------------|
| Human Amniotic Epithelial Cells |
| Bone Marrow Stromal Stem Cells  |
| Bovine Colon Organoids          |
| GSC23 Human Glioma Stem Cells   |
| Human Corneal Epithelial Cells  |
| Human Corneal Keratocytes       |

## Supplementary Python codes

### Trends In Bioink.py

```
# This script returns the Top Biomaterials Used, Top Biomaterial Combinations Used, and Top Printer Companies Used
```

```
import os, csv, pprint, xlswriter
```

```
#User Input
```

```
dataFile = open("MasterDatabase.csv", encoding="utf8")
dataReader = csv.reader(dataFile)
dataList = list(dataReader)
workbook=xlswriter.Workbook("PercentOfBioinksNew.xlsx")
bioInks = workbook.add_worksheet('PercentofBionks')
bioPrinters = workbook.add_worksheet('PercentBioprinters')
topBioInks = workbook.add_worksheet('Top Bioinks')
```

```
#Determines the Top Biomaterials Used
```

```
def topBioinks():
```

```
    bioInkDict = { }
```

```
    counter =1
```

```
    #For Loop Runs through the Entire Spreadsheet
```

```
    for i in range(3,len(dataList)):
```

```
        temp = []
```

```
        #For Loop Runs through each Biomaterial
```

```
        for materialInt in range(3, 12, 3):
```

```
            #Converts the Biomaterial Combinations into a Temp Variable.
```

```
            #This Temp Variable is Sorted Alphabetically and then Converted into Tuple which is Added to
```

```
Dictionary
```

```
            if dataList[i][materialInt] != "":
```

```
                temp.append(dataList[i][materialInt].strip())
```

```
            materialTuple =tuple(sorted(temp))
```

```
            if materialTuple in bioInkDict:
```

```
                bioInkDict[materialTuple] = bioInkDict[materialTuple]+1
```

```
            else:
```

```
                bioInkDict[materialTuple]=1
```

```
    #Outputs and Writes the Dictionary into a Spreadsheet
```

```
    topBioInks.write(0,0,"BIOINK NAME")
```

```
    topBioInks.write(0,1,"AMOUNT OF TIMES")
```

```
    for key, value in bioInkDict.items():
```

```
        temp = ""
```

```
        for i in list(key):
```

```
            temp += i + ", "
```

```
        temp = temp[0:len(temp)-2]
```

```
        topBioInks.write(counter,0,temp)
```

```
        topBioInks.write(counter, 1, value)
```

```
        counter +=1
```



```

def percentOfBioinks():
    materialDict = { }
    #For Loop Iterates through Each Material Columnn
    for materialInt in range(3, 12, 3):
        counter=1
        #For Loop Iterates through the Length of the Spreadsheet
        for i in range(3, len(dataList)):
            material = dataList[i][materialInt].strip()
            #Checks for Blanks and Other Non-Materials
            if(material!="Bioink " and material!="Component 1" and material!=""):
                if material in materialDict:
                    materialDict[material] = materialDict[material]+1
                else:
                    materialDict[material] = 1
    #Writing to a Spreadsheet
    bioInks.write(0,0, "MATERIAL NAME")
    bioInks.write(0,1, "AMOUNT OF TIMES")
    counter = 1
    for key, value, in materialDict.items():
        bioInks.write(counter,0, key)
        bioInks.write(counter, 1, value)
        counter +=1

def tableOfPrinters():
    printerDict = { }
    #For Loop Iterates down the Spreadsheet
    for i in range(3, len(dataList)):
        printer = dataList[i][1].strip()
        #Checks for Blanks and Other Non-Printers
        if printer != "Printer " and printer != "":
            if printer in printerDict:
                printerDict[printer] = printerDict[printer]+1
            else:
                printerDict[printer] = 1
    #Writes to a Spreadsheet
    bioPrinters.write(0,0, "PRINTER COMPANY")
    bioPrinters.write(0,1, "AMOUNT OF TIMES")
    counter = 1
    for key, value, in printerDict.items():
        bioPrinters.write(counter,0, key)
        bioPrinters.write(counter, 1, value)
        counter +=1

topBioinks()
tableOfPrinters()
percentOfBioinks()
workbook.close()

```

**MaterialParser.py**

# This script does two things. First, the script reads and translates a CSV file into a 2D matrix then dictionary of dictionaries(described in the comments below). After doing this, we then write every possible combination of printing parameters into a XLSX file.

```
import os, csv, pprint, xlswriter
#User Input
material = input("Enter the material")
materialLower = material.lower()
soloOrNot = input("Solo or Combination:").lower()
variableX = input("Enter Variable X").lower()
variableY = input("Enter Y Variable to be Graphed between Temperature, Pressure, Speed, Needle Size,
and Product of Temperature/Pressure (POTP)").lower()
variableZ = input("Enter Z Variable to be Graphed between Temperature, Pressure, Speed, Needle Size,
and Product of Temperature/Pressure (POTP)").lower()
x = ""
y = ""
z = ""
xIndex = 0
yIndex = 0
zIndex = 0
```

#Determines the Variables Used for Contour Plot

```
def XYZVariableConverter(variableXYorZ):
```

```
    printingParameters = {
        "temperature": 3,
        "pressure": 2,
        "concentration": 1,
        "speed":4,
        "needle size": 5,
        "molecular weight": 6,
        "potp": 7
    }
```

```
    return printingParameters[variableXYorZ]
```

```
xIndex = XYZVariableConverter(variableX)
```

```
yIndex = XYZVariableConverter(variableY)
```

```
zIndex = XYZVariableConverter(variableZ)
```

#Reads Spreadsheet/Puts Spreadsheet in 2D Matrix

```
dataFile = open("MasterDatabase.csv", encoding="utf8")
```

```
dataReader = csv.reader(dataFile)
```

```
dataList = list(dataReader)
```

#Converts Gauge to Micrometer

```
def needleSizeConverter(needleSize):
```

```
    needleSizes = {
        "10": 2692,
        "11": 2388,
        "12": 2159,
        "13": 1803,
```

```

"14": 1600,
"15": 1372,
"16": 1194,
"17": 1067,
"18": 838,
"19": 686,
"20": 603,
"21": 514,
"22": 413,
"23": 337,
"24": 311,
"25": 260,
"26": 260,
"27": 210,
"28": 184,
"29": 184,
"30": 159,
"31": 133,
"32": 108,
"33": 108,
"34": 51,
}
return needleSizes[str(needleSize)]

```

#Function Returns the Type of Parameter.

#For example, Molecular Weight would return {Molecular Weight High, Molecular Weight Low}.

#While POTP would return {HighHigh, HighLow, LowHigh, and LowLow}.

def amountOfParameters(variableXYorZ):

```

parameters = {
    "concentration": ["Concentration"],
    "molecular weight": ["Molecular Weight High", "Molecular Weight Low"],
    "pressure": ["Pressure High", "Pressure Low"],
    "temperature": ["Temperature High", "Temperature Low"],
    "speed": ["Speed High", "Speed Low"],
    "potp": ["HighHigh", "HighLow", "LowHigh", "LowLow"],
    "needle size": ["Needle Size"]
}
return parameters[variableXYorZ]

```

#Creates all Possible Permutations of Temperature\*Pressure(POTP) and Adds to a Dictionary

def POTP(v):

```

POTPDict = {}
#If High and High Exist
if(v["Temperature High"] != "" and v["Pressure High"] != ""):
    POTPDict["HighHigh"] = float(v["Temperature High"])*float(v["Pressure High"])
#If High and Low Exist
if(v["Temperature High"] != "" and v["Pressure Low"] != ""):
    POTPDict["HighLow"] = float(v["Temperature High"])*float(v["Pressure Low"])
#If Low and High Exist
if(v["Temperature Low"] != "" and v["Pressure High"] != ""):
    POTPDict["LowHigh"] = float(v["Temperature Low"])*float(v["Pressure High"])

```

```

#If Low and Low Exist
if(v["Temperature Low"] != "" and v["Pressure Low"] != ""):
    POTPDict["LowLow"] = float(v["Temperature Low"])*float(v["Pressure Low"])
return POTPDict

#Function Creates a Data Structure that is a Dictionary of Dictionaries with an example structure as
follows:
# {6: {'Concentration': 5.0, 'Needle Size': 400.0, 'Pressure High': 0.5, 'Pressure Low': ',
#   'Row Number': 5, 'Speed High': 10.0, 'Speed Low': ', 'Temperature High': 23.0, 'Temperature Low':
# },
# 7: {'Concentration': 10.0, 'Needle Size': 400.0, 'Pressure High': 0.7, 'Pressure Low': ',
#   'Row Number': 6, 'Speed High': 10.0, 'Speed Low': ', 'Temperature High': 28.0, 'Temperature Low':
# }
#The outer dictionary key holds the column number for that material and the inner dictionary holds the
printing parameter values (we grab all parameters)
def matParser(dataList, soloOrNot):
    matDict = { }
    counter = 0
    #If Bioink is Solo
    if(soloOrNot.lower() == "solo"):
        #Iterates down the Spreadsheet
        for i in range (0, len(dataList) ,1):
            if(dataList[i][3].lower().strip() == materialLower and dataList[i][6]=="" and dataList[i][9]==""
and dataList[i][12] == ""):
                temp={ }
                #Grabs Molecular Weight Data
                if(dataList[i][41] == "" or dataList[i][41]=="N/A"):
                    temp["Molecular Weight High"] = ""
                else:
                    temp["Molecular Weight High"] = float(dataList[i][41])
                if(dataList[i][42] == "" or dataList[i][42]=="N/A"):
                    temp["Molecular Weight Low"] = ""
                else:
                    temp["Molecular Weight Low"] = float(dataList[i][42])
                #Grabs Pressure Data
                if(dataList[i][20] == "" or dataList[i][20]=="N/A"):
                    temp["Pressure High"] = ""
                else:
                    if(dataList[i][21].lower()=="kpa"):
                        temp["Pressure High"] = float(dataList[i][20])/100
                    elif(dataList[i][21].lower()=="psi"):
                        temp["Pressure High"] = float(dataList[i][20])/14.504
                    else:
                        temp["Pressure High"] = float(dataList[i][20])
                if(dataList[i][22] == "" or dataList[i][22]=="N/A"):
                    temp["Pressure Low"] = ""
                else:
                    if(dataList[i][23].lower()=="kpa"):
                        temp["Pressure Low"] = float(dataList[i][22])/100
                    elif(dataList[i][23].lower()=="psi"):
                        temp["Pressure Low"] = float(dataList[i][22])/14.504

```

```

else:
    temp["Pressure Low"] = float(dataList[i][22])
#Grabs Temperature Data
if(dataList[i][24] == "" or dataList[i][24]=="N/A"):
    temp["Temperature High"] = ""
else:
    temp["Temperature High"] = float(dataList[i][24])
if(dataList[i][25] == "" or dataList[i][25]== "N/A"):
    temp["Temperature Low"] = ""
else:
    temp["Temperature Low"] = float(dataList[i][25])
#Grab Needle Size Data
if(dataList[i][18] == "" or dataList[i][18] == "N/A"):
    temp["Needle Size"] = ""
else:
    if dataList[i][19].lower() == "gauge":
        temp["Needle Size"] = float(needleSizeConverter(dataList[i][18]))
    else:
        temp["Needle Size"] = float(dataList[i][18])
#Needle Type
if(dataList[i][17] == "" or dataList[i][17] == "N/A"):
    temp["Needle Type"] = ""
else:
    temp["Needle Type"] = dataList[i][17]
#Grabs Speed Data
if(dataList[i][28] == "" or dataList[i][28]== "N/A"):
    temp["Speed High"] = ""
else:
    temp["Speed High"] = float(dataList[i][28])
if(dataList[i][29] == "" or dataList[i][29]== "N/A"):
    temp["Speed Low"] = ""
else:
    temp["Speed Low"] = float(dataList[i][29])
#Grabs Concentration Data
if(dataList[i][4] == "" or dataList[i][4]=="N/A"):
    temp["Concentration"] = ""
else:
    if(dataList[i][5].lower() != "mg/ml"):
        temp["Concentration"] = float(dataList[i][4])
    else:
        temp["Concentration"] = float(dataList[i][5])/10
#Which Row the Bioink is Located on the Spreadsheet
temp["Row Number"] = i+1
temp.update(POTP(temp))
matDict[counter] = temp
counter+=1
#If Bioink is Combination
else:
    #For Loop Iterates through the Biomaterial Columns
    for materialInt in range(3, 13,3):
        #For Loop Iterates down the Spreadsheet

```

```

for i in range (0, len(dataList) ,1):
    if (dataList[i][materialInt].lower().strip() == materialLower):
        temp = { }
        #Grabs Molecular Weight Data
        if(dataList[i][41] == "" or dataList[i][41]=="N/A"):
            temp["Molecular Weight High"] = ""
        else:
            temp["Molecular Weight High"] = float(dataList[i][41])
        if(dataList[i][42] == "" or dataList[i][42]== "N/A"):
            temp["Molecular Weight Low"] = ""
        else:
            temp["Molecular Weight Low"] = float(dataList[i][42])
        #Grabs Pressure Data
        if(dataList[i][20] == "" or dataList[i][20]=="N/A"):
            temp["Pressure High"] = ""
        else:
            if(dataList[i][21].lower()=="kpa"):
                temp["Pressure High"] = float(dataList[i][20])/100
            elif(dataList[i][21].lower()=="psi"):
                temp["Pressure High"] = float(dataList[i][20])/14.504
            else:
                temp["Pressure High"] = float(dataList[i][20])
        if(dataList[i][22] == "" or dataList[i][22]=="N/A"):
            temp["Pressure Low"] = ""
        else:
            if(dataList[i][23].lower()=="kpa"):
                temp["Pressure Low"] = float(dataList[i][22])/100
            elif(dataList[i][23].lower()=="psi"):
                temp["Pressure Low"] = float(dataList[i][22])/14.504
            else:
                temp["Pressure Low"] = float(dataList[i][22])
        #Grabs Temperature Data
        if(dataList[i][24] == "" or dataList[i][24]=="N/A"):
            temp["Temperature High"] = ""
        else:
            temp["Temperature High"] = float(dataList[i][24])
        if(dataList[i][25] == "" or dataList[i][25]== "N/A"):
            temp["Temperature Low"] = ""
        else:
            temp["Temperature Low"] = float(dataList[i][25])
        #Grabs Speed Data
        if(dataList[i][28] == "" or dataList[i][28]== "N/A"):
            temp["Speed High"] = ""
        else:
            temp["Speed High"] = float(dataList[i][28])
        if(dataList[i][29] == "" or dataList[i][29]== "N/A"):
            temp["Speed Low"] = ""
        else:
            temp["Speed Low"] = float(dataList[i][29])
        #Grabs Needle Size
        if(dataList[i][18] == "" or dataList[i][18] == "N/A"):

```

```

        temp["Needle Size"] = ""
    else:
        if dataList[i][19].lower() == "gauge":
            temp["Needle Size"] = float(needleSizeConverter(dataList[i][18]))
        else:
            temp["Needle Size"] = float(dataList[i][18])
    #Needle Type
    if(dataList[i][17] == "" or dataList[i][17] == "N/A"):
        temp["Needle Type"] = ""
    else:
        temp["Needle Type"] = dataList[i][17]
    #Grabs Concentration Data
    if(dataList[i][materialInt+1] == "" or dataList[i][materialInt+1]=="N/A"):
        temp["Concentration"] = ""
    else:
        if(dataList[i][materialInt+2].lower() != "mg/ml"):
            temp["Concentration"] = float(dataList[i][materialInt+1])
        else:
            temp["Concentration"] = float(dataList[i][materialInt+1])/10
    temp["Row Number"] = i+1
    temp.update(POTP(temp))
    matDict[counter] = temp
    counter += 1
return matDict

```

```

matDict = matParser(dataList, soloOrNot)
#Creates a Spreadsheet
workbook=xlsxwriter.Workbook(soloOrNot + material.replace(" ", "") + "X" + variableX + "Y" +
variableY + "Z" + variableZ + ".xlsx")
worksheet = workbook.add_worksheet()
#Creates Columns Containing Desired Parameters
worksheet.write(0,0,"Material")
worksheet.write(0,1,"Concentration: wt%")
worksheet.write(0,2,"Pressure: bar")
worksheet.write(0,3,"Temperature: C")
worksheet.write(0,4,"Speed: mm/s")
worksheet.write(0,5,"Needle Size")
worksheet.write(0,6,"Molecular Weight")
worksheet.write(0,7,"Product of Temperature and Pressure")
worksheet.write(0,8,"Needle Type")
counter = 1

```

```

#Creates All Possible Permutations of the Three Variables
#For example: X=Molecular Weight, Y=POTP, and Z=Needle Size
#Function will Run Through Each Bioink Combination and Create All Possible Combinations of
Molecular Weight High, Molecular Weight Low, HighHigh, HighLow, LowHigh, LowLow, and Needle
Size
def permutation():
    listX = amountOfParameters(variableX)
    listY = amountOfParameters(variableY)

```

```

listZ = amountOfParameters(variableZ)
counter = 1
for k in matDict.keys():
    v = matDict[k]
    for elemX in listX:
        for elemY in listY:
            for elemZ in listZ:
                if(elemX in v and elemY in v and elemZ in v):
                    if(v[elemX] != "" and v[elemY] != "" and v[elemZ] != ""):
                        worksheet.write(counter,xIndex, v[elemX])
                        worksheet.write(counter, yIndex, v[elemY])
                        worksheet.write(counter, zIndex, v[elemZ])
                        worksheet.write(counter,0,material)
                        worksheet.write(counter, 5, v["Needle Size"])
                        worksheet.write(counter,8, v["Needle Type"])
                        worksheet.write(counter, 1, v["Concentration"])

                counter+=1

permutation()
workbook.close()

```

### Cell Printing.py

# This program returns the Cell Types and a spreadsheet of all cellular printing with needle diameter and needle type

```

import os, csv, pprint, xlswriter
#User Input
dataFile = open("MasterDatabase.csv", encoding="utf8")
dataReader = csv.reader(dataFile)
dataList = list(dataReader)
workbook=xlswriter.Workbook("CellPrinting.xlsx")
cellPrinting = workbook.add_worksheet('AmountofCells')
cellHeatMap = workbook.add_worksheet('CellHeatMap')

```

```

#Converts Gauge to um
def needleSizeConverter(needleSize):
    needleSizes = {
        "10": 2692,
        "11": 2388,
        "12": 2159,
        "13": 1803,
        "14": 1600,
        "15": 1372,
        "16": 1194,
        "17": 1067,
        "18": 838,
        "19": 686,
        "20": 603,
    }

```



```

"21": 514,
"22": 413,
"23": 337,
"24": 311,
"25": 260,
"26": 260,
"27": 210,
"28": 184,
"29": 184,
"30": 159,
"31": 133,
"32": 108,
"33": 108,
"34": 51,
}
return needleSizes[str(needleSize)]

```

#Returns the Cell Types into A Spreadsheet

```

def cellTypes():
    cellDict = {}
    for i in range(3, len(dataList)):
        cell = dataList[i][15].strip()
        if cell.lower() != "cell composition" and cell != "" and cell.lower() != "type":
            if cell in cellDict:
                cellDict[cell] = cellDict[cell]+1
            else:
                cellDict[cell] = 1
    cellPrinting.write(0,0, "CELL TYPE")
    cellPrinting.write(0,1, "AMOUNT OF TIMES")
    counter = 1
    for key, value, in cellDict.items():
        cellPrinting.write(counter,0, key)
        cellPrinting.write(counter, 1, value)
        counter +=1
def matParser(dataList):
    matDict = {}
    counter = 0
    #Iterates down the Spreadsheet
    for i in range (3, len(dataList) ,1):
        if(dataList[i][15]!=""):
            temp={}
            #Grabs Pressure Data
            if(dataList[i][20] == "" or dataList[i][20]=="N/A"):
                temp["Pressure High"] = ""
            else:
                if(dataList[i][21].lower()=="kpa"):
                    temp["Pressure High"] = float(dataList[i][20])/100
                elif(dataList[i][21].lower()=="psi"):
                    temp["Pressure High"] = float(dataList[i][20])/14.504
            else:
                temp["Pressure High"] = float(dataList[i][20])

```

```

if(dataList[i][22] == "" or dataList[i][22]=="N/A"):
    temp["Pressure Low"] = ""
else:
    if(dataList[i][23].lower()=="kpa"):
        temp["Pressure Low"] = float(dataList[i][22])/100
    elif(dataList[i][23].lower()=="psi"):
        temp["Pressure Low"] = float(dataList[i][22])/14.504
    else:
        temp["Pressure Low"] = float(dataList[i][22])
#Grabs Temperature Data
if(dataList[i][24] == "" or dataList[i][24]=="N/A"):
    temp["Temperature High"] = ""
else:
    temp["Temperature High"] = float(dataList[i][24])
if(dataList[i][25] == "" or dataList[i][25]== "N/A"):
    temp["Temperature Low"] = ""
else:
    temp["Temperature Low"] = float(dataList[i][25])
#Grab Needle Size Data
if(dataList[i][18] == "" or dataList[i][18]=="N/A"):
    temp["Needle Size"] = ""
else:
    if dataList[i][19].lower() == "gauge":
        temp["Needle Size"] = float(needleSizeConverter(dataList[i][18]))
    else:
        temp["Needle Size"] = float(dataList[i][18])
#Needle Type
if(dataList[i][17] == "" or dataList[i][17]== "N/A"):
    temp["Needle Type"] = ""
else:
    temp["Needle Type"] = dataList[i][17]
#Grabs Speed Data
if(dataList[i][28] == "" or dataList[i][28]== "N/A"):
    temp["Speed High"] = ""
else:
    temp["Speed High"] = float(dataList[i][28])
if(dataList[i][29] == "" or dataList[i][29]== "N/A"):
    temp["Speed Low"] = ""
else:
    temp["Speed Low"] = float(dataList[i][29])
#Which Row the Bioink is Located on the Spreadsheet
temp["Row Number"] = i+1
matDict[counter] = temp
counter+=1
return matDict
matDict = matParser(dataList)
#Returns a Spreadsheet of the Needle Diameter and Needle Type of Cellular Data
def cellularHeatMap():
    cellDict = {}
    counter = 1
    cellHeatMap.write(0,0, "NOZZLE DIAMETER")

```

```

cellHeatMap.write(0,1, "NEEDLE TYPE")
cellHeatMap.write(0,2, "TEMPERATURE")
cellHeatMap.write(0,3, "PRESSURE")
cellHeatMap.write(0,4, "SPEED")
for i in matDict.keys():
    v=matDict[i]
    for elemX in ["Temperature High", "Temperature Low"]:
        for elemY in ["Pressure High", "Pressure Low"]:
            for elemZ in ["Speed High", "Speed Low"]:
                if(elemX in v and elemY in v and elemZ in v):
                    if(v[elemX] != "" and v[elemY] != "" and v[elemZ] != "" and v["Needle Type"] != "" and
v["Needle Size"] != ""):
                        cellHeatMap.write(counter,2, v[elemX])
                        cellHeatMap.write(counter, 3, v[elemY])
                        cellHeatMap.write(counter, 4, v[elemZ])
                        cellHeatMap.write(counter, 0, v["Needle Size"])
                        if(v["Needle Type"].lower() == "conical"):
                            cellHeatMap.write(counter, 1, 1)
                        else:
                            cellHeatMap.write(counter, 1, 2)
                        counter+=1

```

```

cellTypes()
cellularHeatMap()
workbook.close()

```
